# Supplementary material
Source: PubMed Central journal article supplement (PMC6201087)

## SUPPLEMENTAL MATERIALS

**Table S1:** The observed maximum concentrations of TB drugs by HbA1c% categories, crude and adjusted models

| Cmax        | Geometric Mean    | GMR (95% CI)    | p-value | Adj mean diff   | p-value |
|-------------|-------------------|-----------------|---------|-----------------|---------|
| <b>RMP</b>  |                   |                 |         |                 |         |
| Both visits | 3.57 (3.00 4.24)  | Ref             |         | Ref             |         |
| <5          | 3.51 (2.85 4.35)  | .99 (.75 1.29)  | .921    | .93 (.70 1.24)  | .639    |
| 5-6.5       | 3.92 (3.17 4.86)  | 1.10 (.84 1.43) | .482    | 1.00 (.72 1.40) | .982    |
| >6.5        |                   |                 |         |                 |         |
| Visit 1     |                   |                 |         |                 |         |
| <5          | 4.54 (3.64 5.65)  | Ref             |         | Ref             |         |
| 5-6.5       | 3.32 (2.49 4.43)  | .73 (.51 1.05)  | .086    | 1.03 (.78 1.36) | .836    |
| >6.5        | 4.01 (3.06 5.25)  | .88 (.63 1.25)  | .475    | .77 (.53 1.13)  | .180    |
| Visit 2     |                   |                 |         |                 |         |
| <5          | 2.78 (2.14 3.61)  | Ref             |         | Ref             |         |
| 5-6.5       | 3.76 (2.72 5.18)  | 1.35 (.90 2.04) | .147    | 1.26 (.81 1.95) | .309    |
| >6.5        | 3.83 (2.69 5.44)  | 1.38 (.89 2.12) | .146    | 1.08 (.62 1.91) | .777    |
| <b>INH</b>  |                   |                 |         |                 |         |
| Both visits | 7.58 (6.59 8.72)  | Ref             |         | Ref             |         |
| <5          | 7.40 (6.10 8.97)  | .97 (.76 1.25)  | .831    | .96 (.75 1.24)  | .781    |
| 5-6.5       | 6.63 (5.54 7.95)  | .88 (.69 1.11)  | .272    | .87 (.64 1.17)  | .357    |
| >6.5        |                   |                 |         |                 |         |
| Visit 1     |                   |                 |         |                 |         |
| <5          | 7.87 (6.71 9.22)  | Ref             |         | Ref             |         |
| 5-6.5       | 6.88 (5.19 9.11)  | .76 (.57 1.02)  | .407    | .89 (.64 0.24)  | .487    |
| >6.5        | 6.00 (4.67 7.72)  | .76 (.57 1.02)  | .071    | .84 (.60 1.19)  | .324    |
| Visit 2     |                   |                 |         |                 |         |
| <5          | 7.29 (5.76 9.23)  | Ref             |         | Ref             |         |
| 5-6.5       | 8.02 (6.12 10.50) | 1.10 (.77 1.57) | .595    | 1.06 (.74 1.52) | .757    |
| >6.5        | 7.54 (5.80 9.79)  | 1.03 (.73 1.46) | .849    | .87 (.54 1.41)  | .568    |
| <b>PZA</b>  |                   |                 |         |                 |         |
| Visit 1     |                   |                 |         |                 |         |
| <5          | 31.43 (26.41      | Ref             |         | Ref             |         |
| 5-6.5       | 37.41)            | .95 (.71 1.29)  | .751    | 1.02 (.71 1.46) | .910    |
| >6.5        | 29.95 (23.36      | .67 (.49 .89)   | .006    | 1.22 (.74 2.01) | .430    |
|             | 38.40)            |                 |         |                 |         |
|             | 20.74 (16.23      |                 |         |                 |         |
|             | 26.49)            |                 |         |                 |         |

\*adjusted for age sex weight and baseline bacterial burden

**Table S2:** Exposure-response relationships between TB drugs and time to culture conversion, crude and adjusted model overall and crude model by diabetes status

|                            | HR (95%CI)          | p-value | Adj HR             | p-value |
|----------------------------|---------------------|---------|--------------------|---------|
| DM                         | 1.08 (.83<br>1.42)  | .566    | 1.34 (.91 1.97)    | .132    |
| Age                        | .99 (.98 1.00)      | .228    | .98 (.97 .996)     | .010    |
| Sex                        | 1.53 (1.14<br>2.06) | .004    | 1.75 (1.25 2.45)   | .001    |
| weight                     | 1.00 (.99<br>1.01)  | .840    | 1.01 (.995 1.02)   | .231    |
| Baseline<br>Bacterial load | 1.42 (1.20<br>1.68) | <.001   | 1.40 (1.18 1.66)   | <.001   |
| RMP                        | 1.00 (.98<br>1.03)  | .790    | 1.03 (1.00 1.05)   | .049    |
| INH                        | 1.01 (.98<br>1.04)  | .540    | 1.03 (.99 1.06)    | .105    |
| PZA                        | .99 (.98 .999)      | .030    | .99 (.97 .996)     | .006    |
| <b>No Diabetes</b>         |                     |         | <b>Diabetes</b>    |         |
|                            | Crude<br>HR(95%CI)  | p-value | Crude<br>HR(95%CI) | p-value |
| Age                        | .98 (.97 .996)      | .013    | 1.00 (.98 1.02)    | .998    |
| Sex                        | 1.55 (1.07<br>2.24) | .022    | 1.62 (.99 2.64)    | .055    |
| weight                     | 1.00 (.98<br>1.02)  | .912    | .998 (.98 1.02)    | .858    |
| Baseline<br>Bacterial load | 1.47 (1.16<br>1.88) | .002    | 1.35 (1.07 1.69)   | .012    |
| RMP                        | .97 (.92 1.02)      | .222    | 1.03 (.998 1.06)   | .070    |
| INH                        | .99 (.95 1.02)      | .451    | 1.05 (1.01 1.09)   | .011    |
| PZA                        | .99 (.98 1.01)      | .275    | .98 (.96 .996)     | .018    |

**Table S3.A:** The proportion of patients with culture conversion to negative at week 8 and week 12, by diabetes status and HbA1c categories

| % culture negative | Week 8 (7-9)<br>N=209 | p-value | Week 12(11-13)<br>N=124 | p-value |
|--------------------|-----------------------|---------|-------------------------|---------|
| Diabetes           |                       |         |                         |         |
| No                 | (101)82.79%           | .831    | (69)93.24%              | .794    |
| Yes                | (73)83.91%            |         | (46)92%                 |         |
| Hb1c               |                       |         |                         |         |
| <5.6               | (80)84.21%            | .571    | (52)94.55%              | .670    |
| 5.6 -6.5           | (45)78.95%            |         | (35)89.74%              |         |
| >6.5               | (49)85.96%            |         | (28)93.33%              |         |
| Hba1c              |                       |         |                         |         |
| <6.5               | (122)84.14%           | .606    | (85)93.41%              | .636    |
| >6.5               | (52)81.25%            |         | (30)90.91%              |         |

**Table S3.B:** The odds ratio of patients with culture conversion to negative in crude and adjusted model, by diabetes status

|                         | <b>OR (95%CI)</b> | <b>p-value</b> | <b>Adj OR</b>     | <b>p-value</b> |
|-------------------------|-------------------|----------------|-------------------|----------------|
| DM                      | 1.08 (.52 2.28)   | .831           | 1.54 (.59 4.04)   | .381           |
| Age                     | .98 (.95 1.01)    | .120           | .96 (.93 .999)    | .044           |
| Sex                     | 2.47 (1.02 5.98)  | .046           | 3.44 (1.25 9.45)  | .016           |
| Weight                  | 1.012 (.98 1.04)  | .392           | 1.03 (.99 1.07)   | .144           |
| Baseline bacterial load | 1.77 (1.18 2.67)  | .006           | 1.74 (1.14 2.65)  | .011           |
| RMP                     | 1.02 (.95 1.12)   | .541           | 1.08 (.97 1.20)   | .175           |
| INH                     | 1.02 (.96 1.09)   | .501           | 1.07 (.98 1.16)   | .127           |
| PZA                     | .98 (.96 1.01)    | .143           | .97 (.94 1.00)    | .069           |
| <b>No Diabetes</b>      |                   |                |                   |                |
| Age                     | .96 (.92 .996)    | .033           | .97 (.93 1.03)    | .170           |
| Sex                     | 2.90 (.98 8.55)   | .054           | 4.87 (1.50 15.85) | .008           |
| Weight                  | 1.02 (.97 1.07)   | .503           | 1.07 (.99 1.16)   | .09            |
| Baseline bacterial load | 1.54 (.96 2.45)   | .072           | 1.50 (.93 2.42)   | .097           |
| RMP                     | 1.01 (.87 1.17)   | .909           | 1.07 (.90 1.26)   | .445           |
| INH                     | 1.01 (.91 1.12)   | .824           | 1.07 (.96 1.03)   | .248           |
| PZA                     | .99 (.96 1.02)    | .507           | .99 (.96 1.03)    | .615           |
| <b>Diabetes</b>         |                   |                |                   |                |
| Age                     | .99 (.93 1.04)    | .615           | .94 (.88 1.00)    | .069           |
| Sex                     | 2 (.4 9.89)       | .395           | 5.03 (.89 28.42)  | .067           |
| Weight                  | 1.01 (.98 1.04)   | .543           | 1.02 (.97 1.07)   | .387           |
| Baseline bacterial load | 2.35 (1.02 5.40)  | .045           | 2.72 (.91 8.16)   | .074           |
| RMP                     | 1.04 (.96 1.12)   | .360           | 1.09 (.97 1.23)   | .132           |
| INH                     | 1.03 (.95 1.13)   | .435           | 1.07 (.94 1.22)   | .320           |
| PZA                     | .98 (.94 1.01)    | .185           | .94 (.89 .99)     | .017           |

**Table S4.A:** The incidence rate ratio of treatment failure, crude and adjusted model, by diabetes status

**Failure: overall analysis, stratified by diabetic status (over four months)**

| N=23                      | IRR (95% CI)     | p-value | Adj IRR (95% CI) | p-value |
|---------------------------|------------------|---------|------------------|---------|
| DM                        | .76 (.34 1.69)   | .501    | 1.05 (.42 2.59)  | .920    |
| Age                       | .998 (.97 1.03)  | .915    | .99 (.95 1.02)   | .537    |
| Sex                       | 1.08 (.49 2.38)  | .858    | .92 (.38 2.20)   | .846    |
| weight                    | .99 (.95 1.04)   | .750    | 1.01 (.97 1.06)  | .509    |
| Baseline Bacterial load   | .70 (.46 1.07)   | .104    | .66 (.42 1.06)   | .088    |
| RMP                       | .997 (.93 1.07)  | .926    | .96 (.89 1.04)   | .331    |
| INH                       | 1.04 (.98 1.11)  | .171    | 1.03 (.97 1.09)  | .282    |
| PZA                       | 1.02 (.999 1.05) | .058    | 1.02 (1.0 1.05)  | .049    |
| <b>No Diabetes (n=15)</b> |                  |         |                  |         |
| Age                       | .998 (.95 1.05)  | .922    | .96 (.90 1.03)   | .295    |
| Sex                       | .99 (.38 2.55)   | .976    | .66 (.24 1.85)   | .435    |
| weight                    | .98 (.93 1.04)   | .535    | .997 (.94 1.06)  | .924    |
| Baseline Bacterial load   | .98 (.60 1.60)   | .936    | .997 (.59 1.68)  | .990    |
| RMP                       | 1.04 (.95 1.14)  | .393    | .99 (.90 1.09)   | .837    |
| INH                       | 1.05 (.96 1.16)  | .278    | 1.00 (.93 1.08)  | .905    |
| PZA                       | 1.03 (.995 1.06) | .096    | 1.03 (.999 1.06) | .058    |
| <b>Diabetes (n=8)</b>     |                  |         |                  |         |
| Age                       | 1.02 (.99 1.06)  | .187    | 1.05 (.98 1.12)  | .183    |
| Sex                       | 1.12 (.25 5.05)  | .879    | .57 (.06 5.53)   | .630    |
| weight                    | 1.01 (.95 1.07)  | .752    | 1.02 (.96 1.09)  | .493    |
| Baseline Bacterial load   | .30 (.16 .53)    | <.001   | .21 (.10 .48)    | <.001   |
| RMP                       | .93 (.81 1.07)   | .301    | .91 (.70 1.18)   | .492    |
| INH                       | 1.03 (.96 1.10)  | .426    | 1.12 (1.03 1.21) | .006    |
| PZA                       | 1.02 (.98 1.06)  | .401    | 1.03 (.97 1.10)  | .344    |

**Table S4.B:** The incidence rate ratio of failure, crude and adjusted model, among patients with HbA1c% values above 8%

**Failure if HbA1c $\geq$ 8 (n=5)**

|                         | IRR (95% CI)     | p-value | Adj IRR (95% CI) | p-value |
|-------------------------|------------------|---------|------------------|---------|
| Age                     | .999 (.94 1.06)  | .968    | 1.04 (.93 1.16)  | .499    |
| Sex                     | 1.05 (.13 8.24)  | .966    | .30 (.01 17.021) | .558    |
| weight                  | .96 (.91 1.01)   | .124    | .99 (.95 1.03)   | .613    |
| Baseline Bacterial load | .36 (.18 .72)    | .004    | .22 (.05 .90)    | .035    |
| RMP                     | .91 (.73 1.14)   | .413    | .70 (.40 1.22)   | .205    |
| INH                     | 1.07 (.99 1.15)  | .097    | 1.18 (.98 1.41)  | .078    |
| PZA                     | 1.08 (1.04 1.12) | <.001   | 1.12 (.99 1.27)  | .075    |

**Table S4.C:** The incidence rate ratio of treatment relapse, crude and adjusted model, by diabetes status

**Relapse:**

| N=28/218                  | IRR (95% CI)     | p-value | Adj IRR (95% CI) | p-value |
|---------------------------|------------------|---------|------------------|---------|
| DM                        | 1.02 (.49 2.10)  | .967    | 1.31 (.45 3.85)  | .618    |
| Age                       | .99 (.97 1.02)   | .592    | .99 (.95 1.03)   | .569    |
| Sex                       | .97 (.45 2.09)   | .944    | .93 (.40 2.15)   | .860    |
| weight                    | .99 (.96 1.02)   | .497    | .99 (.96 1.03)   | .752    |
| Baseline Bacterial load   | .71 (.49 1.05)   | .087    | .68 (.44 1.04)   | .076    |
| RMP                       | .99 (.92 1.06)   | .733    | .98 (.91 1.06)   | .558    |
| INH                       | 1.03 (.97 1.08)  | .369    | 1.02 (.96 1.09)  | .499    |
| PZA                       | 1.01 (.99 1.04)  | .329    | 1.01 (.98 1.05)  | .498    |
| <b>No Diabetes (n=16)</b> |                  |         |                  |         |
| Age                       | 1.02 (.98 1.05)  | .326    | 1.01 (.97 1.05)  | .782    |
| Sex                       | 1.18 (.45 3.06)  | .736    | 1.49 (.51 4.35)  | .470    |
| weight                    | .99 (.92 1.07)   | .863    | 1.03 (.96 1.10)  | .472    |
| Baseline Bacterial load   | .64 (.37 1.09)   | .102    | 1.53 (.30 .93)   | .027    |
| RMP                       | 1.01 (.92 1.10)  | .906    | .96 (.87 1.07)   | .466    |
| INH                       | 1.11 (1.03 1.20) | .007    | 1.14 (1.03 1.27) | .012    |
| PZA                       | 1.02 (.98 1.06)  | .433    | 1.00 (.96 1.05)  | .832    |
| <b>Diabetes (n=12)</b>    |                  |         |                  |         |
| Age                       | .96 (.91 1.01)   | .111    | .96 (.90 1.02)   | .190    |
| Sex                       | .66 (.15 2.90)   | .582    | 1.00 (.20 4.96)  | .999    |
| weight                    | .98 (.94 1.02)   | .325    | .97 (.93 1.01)   | .184    |

|                         |                 |      |                 |      |
|-------------------------|-----------------|------|-----------------|------|
| Baseline Bacterial load | .83 (.50 1.40)  | .492 | .83 (.49 1.39)  | .471 |
| RMP                     | .98 (.88 1.09)  | .654 | 1.00 (.90 1.12) | .987 |
| INH                     | .95 (.87 1.04)  | .241 | .86 (.76 .97)   | .016 |
| PZA                     | 1.01 (.97 1.05) | .606 | 1.02 (.98 1.07) | .356 |

**Table S4.D:** The incidence rate ratio of overall-cause death, crude and adjusted model, by diabetes status

**Death:**

| N=14                     | IRR (95% CI)     | p-value | Adj IRR (95% CI) | p-value |
|--------------------------|------------------|---------|------------------|---------|
| DM                       | .87 (.28 2.69)   | .814    | .87 (.19 3.93)   | .862    |
| Age                      | 1.01(.97 1.05)   | .620    | 1.02 (.98 1.06)  | .339    |
| Sex                      | .37 (.08 1.65)   | .192    | .34 (.04 2.56)   | .293    |
| weight                   | .97 (.92 1.03)   | .310    | .96 (.87 1.07)   | .481    |
| Baseline Bacterial load  | .61 (.35 1.07)   | .083    | .69 (.96 1.14)   | .170    |
| RMP                      | 1.06 (.98 1.14)  | .158    | 1.04 (.96 1.14)  | .357    |
| INH                      | 1.03 (.91 1.15)  | .676    | 1.03 (.88 1.21)  | .724    |
| PZA                      | 1.01(.96 1.06)   | .740    | 1.00 (.95 1.06)  | .945    |
| <b>No Diabetes (n=8)</b> |                  |         |                  |         |
| Age                      | 1.01 (.96 1.06)  | .675    | .999 (.94 1.06)  | .968    |
| Sex                      | .21 (.03 1.70)   | .143    | .21 (.01 4.69)   | .322    |
| weight                   | .99 (.90 1.10)   | .918    | 1.03 (.82 1.29)  | .784    |
| Baseline Bacterial load  | .70 (.36 1.36)   | .293    | .92 (.45 1.89)   | .815    |
| RMP                      | 1.16 (1.04 1.29) | .007    | 1.18 (.99 1.40)  | .062    |
| INH                      | 1.04 (.88 1.23)  | .650    | .96 (.78 1.16)   | .667    |
| PZA                      | 1.03 (.95 1.11)  | .497    | 1.04 (.92 1.17)  | .523    |
| <b>Diabetes (n=6)</b>    |                  |         |                  |         |
| Age                      | 1.04 (.95 1.12)  | .412    | 1.04 (.97 1.11)  | .267    |
| Sex                      | .86 (.10 7.65)   | .890    | .54 (.02 12.18)  | .695    |
| weight                   | .94 (.85 1.05)   | .271    | .94 (.83 1.08)   | .382    |
| Baseline Bacterial load  | .47 (.17 1.31)   | .150    | .48 (.17 1.34)   | .161    |
| RMP                      | .95 (.78 1.16)   | .624    | .94 (.83 1.07)   | .372    |
| INH                      | 1.01 (.84 1.21)  | .923    | 1.05 (.78 1.41)  | .737    |
| PZA                      | .99 (.92 1.06)   | .734    | .99 (.90 1.08)   | .800    |

**Table S4.F:** The odds ratio of overall unfavorable effects (failure, relapse or death), crude and adjusted model, by diabetes status

**Overall unfavorable events: (failure or relapse or death)**

| N=61                      | OR (95% CI)      | p-value | *Adj OR         | p-value |
|---------------------------|------------------|---------|-----------------|---------|
| DM                        | 1.06 (.59 1.92)  | .836    | 1.43 (.62 3.27) | .403    |
| Age                       | 1.00 (.98 1.02)  | .884    | .99 (.96 1.02)  | .554    |
| Sex                       | 1.00 (.54 1.86)  | .999    | .88 (.42 1.83)  | .727    |
| weight                    | .99 (.96 1.02)   | .416    | .99 (.96 1.03)  | .747    |
| Baseline Bacterial load   | .66 (.48 .91)    | .011    | .66 (.47 .93)   | .017    |
| RMP                       | 1.00 (.95 1.06)  | .977    | .99 (.92 1.06)  | .716    |
| INH                       | 1.03 (.98 1.08)  | .319    | 1.03 (.97 1.09) | .404    |
| PZA                       | 1.01 (.99 1.04)  | .181    | 1.01 (.99 1.04) | .405    |
| <b>No Diabetes (n=35)</b> |                  |         |                 |         |
| Age                       | 1.01 (.97 1.04)  | .697    | .99 (.95 1.03)  | .512    |
| Sex                       | 1.02 (.47 2.24)  | .952    | 1.06 (.41 2.75) | .900    |
| weight                    | .99 (.94 1.04)   | .679    | 1.02 (.96 1.08) | .593    |
| Baseline Bacterial load   | .71 (.46 1.10)   | .125    | .96 (.43 1.11)  | .126    |
| RMP                       | 1.07 (.98 1.16)  | .122    | 1.03 (.97 1.17) | .615    |
| INH                       | 1.08 (1.00 1.16) | .049    | 1.07 (.97 1.05) | .177    |
| PZA                       | 1.02 (.99 1.05)  | .206    | 1.01 (.98 1.05) | .580    |
| <b>Diabetes (n=26)</b>    |                  |         |                 |         |
| Age                       | .99 (.95 1.04)   | .739    | .99 (.95 1.04)  | .832    |
| Sex                       | 1.01 (.35 2.92)  | .991    | .81 (.21 3.10)  | .763    |
| weight                    | .98 (.94 1.02)   | .368    | .98 (.93 1.03)  | .345    |
| Baseline Bacterial load   | .45 (.27 .85)    | .012    | .49 (.28 .88)   | .016    |
| RMP                       | .94 (.85 1.04)   | .226    | .96 (.87 1.05)  | .365    |
| INH                       | .97 (.91 1.05)   | .483    | .97 (.87 1.07)  | .526    |
| PZA                       | 1.01 (.98 1.04)  | .560    | 1.01 (.97 1.06) | .498    |

\*adjusted for age sex weight baseline bacterial load



**Table S5.A:** Overall unfavorable effects by drug concentration above or below the therapeutic target

|               | N(%)        | OR   | 95% CI       | p-value |
|---------------|-------------|------|--------------|---------|
| <b>PZA</b>    |             |      |              |         |
| Below the TTC | 20 (19.42%) | 1.92 | 1.03<br>3.59 | .041    |
| Above the TTC | 37 (31.62%) |      |              |         |
| <b>INH</b>    |             |      |              |         |
| Below the TTC | 8 (22.86%)  | 1.18 | .50 2.75     | .707    |
| Above the TTC | 53 (25.85%) |      |              |         |
| <b>RMP</b>    |             |      |              |         |
| Below the TTC | 46 (23.96%) | 1.44 | .72 2.89     | .302    |
| Above the TTC | 15 (31.25%) |      |              |         |

**Table S5.B:** Overall unfavorable effects by HbA1c values above or below 8%

|               | HbA1c<8%   |      |              |         | HbA1c>=8% |      |                |         |
|---------------|------------|------|--------------|---------|-----------|------|----------------|---------|
|               | N(%)       | OR   | 95% CI       | p-value | N(%)      | OR   | 95% CI         | p-value |
| <b>PZA</b>    |            |      |              |         |           |      |                |         |
| Below the TTC | 16(26.23%) | 1.34 | .66-<br>2.74 | .421    | 4(9.52%)  | 3.8  | .93 -<br>15.57 | .064    |
| Above the TTC | 31(32.29%) |      |              |         | 6(28.57%) |      |                |         |
| <b>INH</b>    |            |      |              |         |           |      |                |         |
| Below the TTC | 7(33.33%)  | .81  | .31-<br>2.16 | .681    | 1(7.14%)  | 2.66 | .30-<br>23.36  | .378    |
| Above the TTC | 44(28.95%) |      |              |         | 9(16.98%) |      |                |         |
| <b>RMP</b>    |            |      |              |         |           |      |                |         |
| Below the TTC | 39(28.47%) | 1.26 | .57-<br>2.76 | .570    | 7(12.93%) | 2.29 | .49-<br>10.66  | .293    |
| Above the TTC | 12(33.33%) |      |              |         | 3(25%)    |      |                |         |

**Figure S1.** Concentration-time profiles of rifampicin (Panel A), isoniazid (Panel B), and pyrazinamide (Panel C) during the intensive phase of TB treatment.

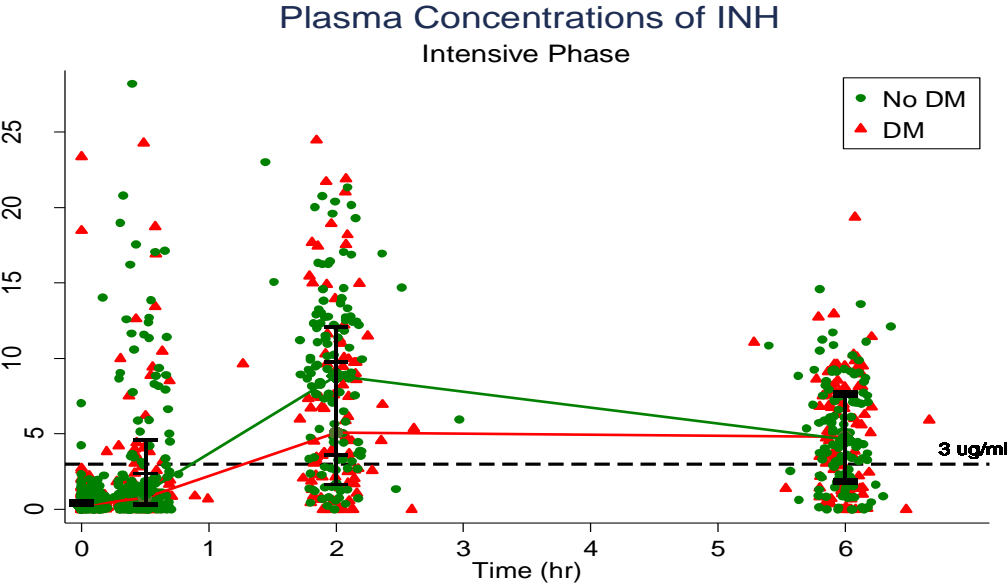

### Plasma Concentrations of PZA Intensive Phase

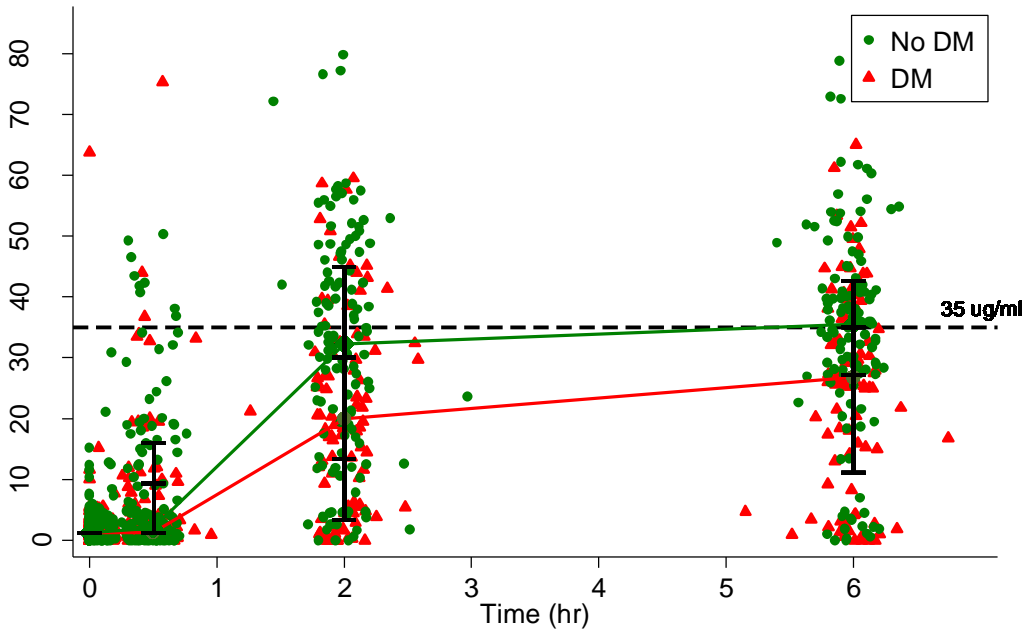

### Plasma Concentrations of RMP Intensive Phase

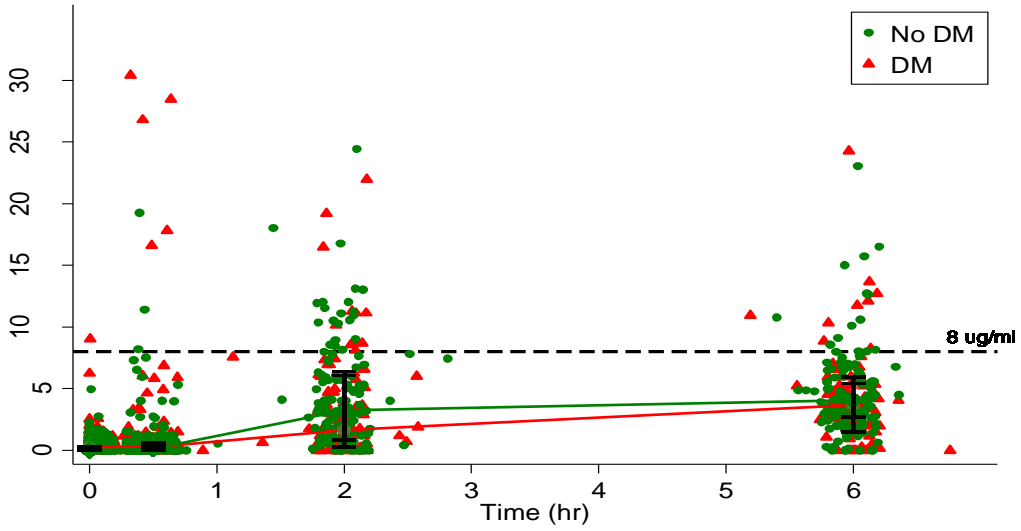

Supplement: zac011187569s1.pdf [file zac011187569s1.pdf]
